# Supplementary material for: Contrast in the density and biomass of fish in a reef system with different fishing intensity in the Mexican Caribbean
Source: PeerJ. 2025 Apr 4;13:e19031. doi: 10.7717/peerj.19031 (PMC11974544; doi:10.7717/peerj.19031)
Supplement: Supplemental Information 2 — Sheet 1: Abundance and size where the abundance and size of the fish are found, the number that is not in parenthesis is the abundance and the number that is inside the parenthesis is the size. Sheet 2: Only the abundances are shown. In this matrix are the 120 species recorded in the 130 stations, in each station it is mentioned to which habitat it belongs (Wall, Small patch, Complex patch, coral beads, Acropora patch, Sand, Seagrasses, Hard bottom and Massifs and canals). [file peerj-13-19031-s002.xls]

## Sheet: Abundance and size
August - September 2008	Wall	Small patch	Small patch	Complex patch	Complex patch	Complex patch	Complex patch	Complex patch	Acropora patch	Complex patch	Complex patch	Complex patch	Complex patch	Complex patch	Small patch	Small patch	Complex patch	Small patch	Acropora patch	Complex patch	Complex patch	Small patch	coral beads	Complex patch	Small patch	Small patch	Complex patch	Small patch	Complex patch	Complex patch	Complex patch	Complex patch	Acropora patch	Acropora patch	Small patch	Small patch	Small patch	Arenal	Complex patch	coral beads	Hard bottom	Hard bottom	Hard bottom	Hard bottom	Hard bottom	Small patch	Seagrasses	Seagrasses	Sand
	1	2	3	4	5	6	7	8	9	10	11	12	13	14	15	16	17	18	19	20	21	22	23	24	25	26	27	28	29	30	31	32	33	34	35	36	37	38	39	40	41	42	43	44	45	46	47	48	49
Abudefduf saxatilis	1(15)								10(6)35(15)					5(6)24(15)						3(15)		4(6)4(15)		2(8)5(15)									5(6)20(15)	10(6)15(8)
Abudefduf taurus
Acanthurus coereleus	9(14)2(7)	10(14)10(7)	4(14)	5(14)5(12)	5(14)	2(8)8(14)	8(8)12(14)	7(14)	12(14)	5(8)5(14)	2(8)2(14)	2(6)4(13)	8(6)18(14)	3(8)9(14)	3(4)	2(6)1(14)	4(4)10(14)	5(6)12(8)	5(4)12(8)16(14)	30(6)140(14)	4(6)8(14)	12(6)38(14)	3(7)2(5)	2(8)8(14)	3(6)5(14)	10(6)20(14)	5(8)25(14)	5(6)25(14)	2(6)23(14)	2(8)8(14)	10(14)	4(8)6(14)	5(6)20(14)	5(6)6(14)	2(6)2(8)	3(6)3(8)	3(6)3(14)		6(14)	2(5)1(8)	5(14)	6(13)	5(8)20(14)	8(8)10(14)	6(8)24(14)	2(6)4(8)	2(7)		1(7)
Acanthurus chirurgus	5(8)2(14)	10(10)	15(14)5(6)	10(14)10(10)	12(14)	4(14)	1(14)	4(14)	8(6)34(14)	5(8)15(14)	4(7)7(14)	4(8)10(14)	4(6)12(14)	5(6)10(14)			4(6)8(14)	4(8)	2(8)23(14)	10(14)	4(8)6(14)	3(6)4(14)	14(5)8(7)	3(14)	3(6)10(14)	15(5)15(14)	5(14)	3(6)4(14)	10(14)	2(14)	3(8)19(14)	10(14)	15(6)45(14)	5(6)25(14)	3(6)4(8)	2(6)3(14)	3(6)4(14)		4(14)	5(6)5(8)3(14)	4(14)	2(12)2(14)	4(14)	5(10)30(14)	10(14)	10(7)20(8)	1(7)	2(7)
Aetobatus narinari
Anisotremus virginicus
Aulostomus maculatus				1(66)																																	1(23)
Balistes carolinensis															3(18)1(23)
Balistes vetula		1(15)							1(8)						1(16)1(22)	1(16)	2(30)			2(30)		3(16)	2(16)1(20)		3(14)	2(18)							1(12)		1(14)		2(16)			2(10)		3(32)	2(30)	1(24)3(30)	2(30)	2(16)
Bodianus rufus																1(8)1(27)	2(16)					1(10)		1(27)													1(8)1(12)				1(26)		1(26)
Bothus lunatus																																		1(14)		1(12)	1(10)
Calamus pennatula
Cantherhines macrocerus
Caranx hippos																																								1(33)
Caranx latus
Caranx ruber	2(19)	1(10)	1(18)					2(25)	3(12)	2(25)	3(26)	2(27)	7(28)	2(26)				1(28)1(10)	3(12)			2(14)		1(18)2(28)	7(10)	3(12)		2(14)1(27)	3(25)		1(22)		3(16)1(25)	3(12)						1(12)						1(12)
Clepticus parrae																	12(6)37(14)		3(8)		23(8)			20(6)30(14)		5(6)15(8)	7(8)	5(7)	2(6)10(14)	10(6)50(8)	6(8)	10(6)50(14)
Cryptotomus roseus
Chaetodon aculeatus
Chaetodon capistratus	1(12)1(10)	2(10)1(5)	2(10)2(6)	2(8)2(10)	2(8)2(10)	1(6)2(8)	2(6)5(8)	1(6)4(9)	1(5)2(10)	2(9)	1(10)	1(10)		2(9)	1(5)2(9)	2(5)2(9)	1(5)3(9)	1(4)1(9)	1(5)1(9)	1(9)	2(9)	1(6)1(9)			1(6)	1(6)1(5)	2(9)	1(5)1(10)	2(9)	2(9)	2(9)	2(9)	4(6)2(9)	4(5)4(10)	1(6)1(9)	1(5)1(9)	2(6)2(9)		1(9)			1(9)	1(9)	2(9)	2(9)	1(6)1(4)
Chaetodon ocellatus								1(12)							1(8)	2(6)												1(12)		1(12)
Chaetodon striatus		1(6)	2(8)	2(12)	2(13)	1(12)		1(7)1(12)	1(6)	1(6)2(12)	1(12)						2(5)3(12)	1(6)	1(12)1(6)		1(12)	1(5)			1(8)	1(6)								1(4)	1(6)				1(12)			1(12)		1(12)	2(12)	1(5)
Chromis cyanea	40(8)	10(8)	10(8)5(6)1(4)	10(8)4(4)	20(8)3(4)	5(8)	10(8)3(4)							4(8)	20(3)23(8)	10(3)20(8)	12(4)50(8)	8(3)23(8)		3(3)5(8)		1(3)4(8)		15(3)55(8)	5(3)15(8)	4(3)11(8)	10(8)	5(4)16(8)	7(8)	5(8)	3(4)18(8)	12(4)50(8)	4(4)6(8)	5(3)5(8)		4(4)8(8)	3(3)4(8)				2(3)15(8)
Chromis multilineata																								30(3)178(8)
Dasyatis americana																																					1(60)
Diodon holocanthus		1(10)													1(16)
Diodon hystrix			1(12)
Epinephelus adscensionis																																							1(25)
Cephalopholis cruentata																																									1(23)	1(26)		5(25)	6(24)
Cephalopholis fulva		1(12)1(27)	1(15)1(25)				2(25)		2(14)				1(22)	1(22)								2(15)	1(10)						1(24)													1(20)		2(28)	1(23)
Epinephelus guttatus																															1(30)	2(32)							1(28)
Epinephelus itajara
Epinephelus morio
Epinephelus striatus																													1(34)		1(24)
Gerres cinereus												3(17)	2(18)	2(16)					5(12)6(16)															1(20)				2(16)
Gymnothorax moringa
Ginglymostoma cirratum																																									1(150)
Gramma loreto	7(4)3(3)	3(4)	4(4)	5(4)	15(4)5(2)	20(4)10(3)	15(4)5(3)	5(3)19(4)	5(4)	3(3)11(4)	2(4)	3(3)5(4)	4(4)	3(3)4(4)	3(3)3(6)	2(2)3(4)	2(2)5(4)	2(3)4(4)	3(2)4(4)	3(2)12(4)	3(2)5(4)	5(2)9(4)					3(3)7(4)	3(2)3(4)	5(4)	2(2)5(4)	5(4)	4(4)			3(2)3(4)	3(2)4(4)	2(2)4(6)		5(4)
Gramma melacara	2(4)				2(4)	2(5)	2(4)	1(4)
Haemulon album																	1(40)																								1(38)	1(28)	2(38)
Haemulon aurolineatum						5(20)		5(20)	6(12)	3(23)	3(13)	4(20)		2(13)								3(12)			10(10)10(12)				10(20)						2(12)2(34)		8(14)2(22)
Haemulon carbonarium							1(20)								2(12)
Haemulon chrysargyreum								1(15)	1(12)	1(20)			1(22)				1(21)									2(12)			30(22)	1(25)			1(16)				2(18)
Haemulon flavolineatum	2(14)	3(10)2(12)	3(12)2(18)		4(30)	2(20)	3(20)	3(24)	5(10)23(16)	2(20)	2(20)	3(22)	2(20)	3(19)	2(10)3(17)	2(10)5(20)	5(23)	3(10)3(12)3(23)	3(10)2(24)		6(10)3(24)	15(10)2(25)	3(10)	3(10)7(18)	6(12)	4(12)2(23)	3(10)2(20)	7(12)3(20)		3(16)18(20)	2(12)4(18)	3(14)3(22)	20(14)10(22)	2(10)	4(12)1(22)	4(10)	15(10)		2(14)2(20)		2(23)		2(20)		36(14)34(20)	7(12)
Haemulon macrostoma					2(16)		1(14)									3(16)		7(12)							3(14)
Haemulon melanurum		4(10)	3(12)						3(12)	3(24)	20(12)2(25)		12(10)3(22)	4(12)2(18)		2(14)2(23)		4(14)	2(14)	2(24)	8(12)5(26)	8(12)		3(14)3(24)	4(8)	4(10)		6(10)	3(30)		2(24)		3(12)	5(12)	2(10)2(23)	6(12)	3(14)3(25)									2(13)
Haemulon parra					2(30)		1(34)	2(32)	1(34)		1(30)					2(26)	2(24)2(34)				1(28)			3(40)
Haemulon plumieri		5(14)		2(15)	3(35)2(30)		4(35)	7(32)	5(12)27(17)	4(22)	3(28)	2(30)	3(30)	10(25)	3(12)	5(22)3(28)	6(24)	3(23)2(30)	3(16)4(30)	5(25)	2(30)	3(16)3(28)		2(28)		5(12)2(28)	2(30)	3(12)		3(30)	2(30)	3(30)	5(15)6(26)	2(16)1(23)		4(16)2(23)	4(14)2(25)		3(14)6(25)			2(28)	1(30)		2(14)8(25)	4(16)
Haemulon sciurus			2 (15)	2(32)	2(26)							2(28)	2(23)	4(22)	2(18)	3(18)	3(24)2(30)			3(24)				1(26)			1(25)	2(14)1(23)					1(16)			2(12)
Halichoeres bivittatus	3(16)1(13)	1(12)	2(10)2(14)	2(10)	4(14)2(8)	5(14)	6(8)4(14)	4(8)5(10)	1(6)2(14)	3(8)7(14)	2(8)5(14)	2(14)	3(14)	3(14)2(8)	2(6)6(14)	2(8)3(14)	3(14)	4(6)4(14)	3(14)	3(6)6(14)	1(6)3(14)	5(8)8(14)	5(6)	1(10)2(14)	2(10)	3(8)2(14)	2(14)	2(8)4(14)	2(14)	3(14)	2(14)	2(10)	3(6)3(14)	2(6)3(14)	2(6)1(14)	3(6)4(14)	4(6)4(14)		2(14)	2(4)2(6)2(14)	3(10)	2(10)	1(8)1(14)	3(10)	2(10)	3(7)5(14)			1(10)
Halichoeres garnoti	1(15)	5(13)5(8)	2(13)	2(10)	4(13)	3(10)3(13)	5(12)4(8)	5(13)	2(8)3(13)	1(8)4(13)	2(13)	2(13)	1(13)	3(13)	4(7)6(13)	3(8)3(13)	4(13)	2(13)	2(10)	2(13)	2(13)	3(8)8(13)	1(8)	3(8)3(13)	4(8)4(13)	2(7)3(13)		3(8)4(13)	3(10)	2(9)3(13)	3(13)	4(13)	1(8)	3(5)2(13)	3(8)4(13)	5(8)5(13)	4(6)6(13)		2(8)4(13)	2(5)2(13)	6(13)	1(13)	1(8)2(13)	4(13)	3(13)	4(8)5(13)	2(10)	1(8)2(13)
Halichoeres maculipinna		2(8)	2(8)3(11)	1(8)	2(11)	2(7)	3(11)	4(8)	1(7)	1(7)3(11)	2(11)		1(6)3(11)	2(11)	4(11)	5(11)	3(8)4(11)	4(6)6(11)	1(11)	2(6)4(11)	1(7)1(11)	3(6)12(11)	4(6)3(8)	2(8)2(11)	5(7)10(11)	2(7)2(11)	2(11)	4(11)	3(11)	3(11)	5(11)	1(7)4(11)	1(7)1(11)	2(11)	3(7)5(11)	3(7)5(11)	2(6)5(11)		2(11)	3(5)2(11)	3(11)	2(11)	3(11)	1(8)2(11)	3(11)	5(6)5(11)	1(11)	3(11)
Halichoeres poeyi																																			2(10)
Halichoeres radiatus		2(22)	3(23)	1(8)	1(8)	1(8)	2(24)	1(22)		2(8)2(24)	1(24)				2(22)1(8)	3(24)						3(25)			3(6)												2(8)			1(6)	1(22)		1(22)	1(22)	1(22)	1(8)	1(8)	1(8)
Xyrichtys splendens
Holacanthus ciliaris			2(20)		1(28)	2(22)1(26)	4(25)						1(21)	1(23)			1(26)	1(14)	1(13)	1(22)	1(26)						2(23)			1(26)			2(14)	2(14)
Holacanthus tricolor	1(17)				2(22)	1(18)						1(16)					1(18)					1(12)				1(13)	1(16)					1(16)	1(10)1(20)	1(8)		1(10)	1(8)		1(18)					2(15)	1(14)
Holocentrus ascensionis								1(20)	2(15)					2(16)2(22)	2(16)	1(16)				1(22)			1(10)	1(22)					1(18)2(22)	1(22)							6(12)2(22)		4(22)	3(12)	2(18)2(20)	3(21)	2(18)2(20)	2(22)	2(22)	2(14)1(22)
Holocentrus rufus	1(18)	1(14)2(24)	1(16)				2(20)	5(22)		1(24)	1(20)1(22)				2(18)					1(24)				1(18)	2(16)	1(14)	1(20)(22)	1(16)1(23)				1(18)2(23)	2(14)2(22)	1(16)1(22)		2(14)			1(15)
Hypoplectrus aberrans
Hypoplectrus indigo
Hypoplectrus nigricans																			1(8)	1(10)							1(10)			1(10)		1(10)	1(10)
Hypoplectrus puella												2(10)													1(10)						1(10)
Hypoplectrus unicolor																		1(6)	1(10)								2(6)		1(11)			1(10)
Inermia vittata																	20(5)110(9)																									3(10)		2(8)		2(7)
Kyphosus sectatrix																																	10(18)20(30)
Lactophrys bicaudalis																									1(20)								1(16)
Lactophrys polygonius
Lactophrys triqueter
Lachnolaimus maximus							2(42)		1(14)																						1(26)		1(23)
Lutjanus analis										2(40)	1(30)		2(20)1(40)	2(24)1(30)		2(22)	1(32)				1(40)						1(35)	1(20)	1(34)				1(16)1(28)				1(20)		1(25)1(28)
Lutjanus apodus		4(14)	2(14)		2(30)			3(28)	10(14)	2(20)2(22)		2(30)	3(30)	1(26)					3(14)	1(26)				3(18)		3(12)	1(28)				2(34)	1(30)	5(16)5(28)	1(12)
Lutjanus cyanopterus
Lutjanus griseus		5(16)	3(14)1(24)				1(26)	1(30)	4(18)	2(20)	3(20)	1(20)							5(14)						5(12)1(23)												2(18)		2(24)
Lutjanus jocu																															1(40)
Lutjanus synagris		2(12)1(23)	4(16)						5(20)	1(22)				1(29)	2(18)	2(14)			5(18)3(12)			3(12)
Malacanthus plumieri						5(32)																															3(30)					1(35)		1(36)
Melichthys niger	10(28)10(24)														10(26)20(32)	6(18)15(24)																								3(16)1(18)
Microspathodon chrysurus	1(10)				1(10)	1(9)												2(5)3(8)						1(8)						2(8)			4(6)6(8)	5(6)10(8)
Mycteroperca bonaci																																											1(40)
Mycteroperca phenax
Mycteroperca tigris
Mycteroperca venenosa
Monacanthus tuckeri
Mulloidichthys martinicus						2(25)	1(24)	4(25)			3(20)	2(24)	1(20)	4(22)	1(16)2(12)	3(22)				2(20)3(30)	3(24)						4(22)						2(16)2(22)	2812)											10(16)	3(10)
Myripristis Jacobus
Ocyurus chrysurus	20(22)	1(16)	2(22)2(20)	2(22)		5(32)	2(26)	3(27)	5(16)	5(22)	3(25)	2(22)	2(20)	4(24)	6(24)10(18)	10(20)20(28)	10(20)22(28)	10(20)10(28)	4(16)2(24)	2(16)10(26)	3(30)	2(18)2(23)		2(18)6(26)		2(14)2(24)		5(8)	2(18)8(26)	3(14)10(22)	2(20)5(28)		2(16)2(24)		4(16)	2(16)	10(16)10(28)		3(17)3(24)		9(28)	5(22)	2(25)		4(14)6(26)
Pomacanthus arcuatus				1(40)																2(36)																			2(27)
Pomacanthus paru														1(28)						1(36)																						2(20)		1(32)
Priacanthus arenetus
Pseudopeneus maculatus							2(23)				2(16)	2(16)	2(16)				3(18)			1(16)							2(20)	10(10)	2(16)
Rachycentron canadum																																									1(60)
Scarus coelestinus																											2(40)
Scarus coeruleus				1(32)	1(30)	2(27)	1(24)	3(25)		1(26)	1(23)	1(24)	1(23)	1(26)	1(20)					1(26)				1(26)	2(18)		1(24)		1(26)		2(28)		1(20)	1(18)	1(23)	1(26)			2(26)		1(30)	1(27)1(35)	1(30)	1(30)	1(28)
Scarus guacamaia						1(40)														1(40)																1(38)										1(40)
Scarus iseri	1(23)		3(24)	2(24)	2(26)	3(20)	2(25)	1(18)1(26)		1(26)	1(25)	2(26)	1(22)	1(22)	1(24)		2(28)	2(24)	2(23)		1(25)	1(20)2(26)	1(16)	1(18)1(24)	2(23)	2(16)2/26)	1(28)	2(18)	1(20)2(24)	2(26)	1(18)2(26)	1(26)		1(18)1(30)		1(18)	1(20)1(28)				1(25)	1(30)	1(26)	2(25)
Scarus taeniopterus	2(32)	1(34)	1(35)	3(34)	4(30)	3(26)4(30)	3(26)3(31)	1(30)3(26)	1(36)	1(28)2(33)	2(25)	2(24)	2(18)1(28)	2(28)	4(26)	2(26)	3(25)	1(24)2(30)	1(26)	3(26)	1(30)	2(22)	2(10)	2(28)	1(28)	2(28)	1(20)2(26)	1(20)1(28)	1(30)	2(28)	2(30)	1(19)2(26)	1(18)2(26)	1(23)	1(18)1(30)		3(20)2/30)		1(30)	1(23)		1(29)	1(34)	2(30)	1(20)1(25)	1(20)
Scarus vetula	2(35)	1(24)	1(26)	1(32)	1(30)	2(32)	2(32)1(23)	1(32)	1(26)	1(34)		1(29)	1(32)	1(28)	2(16)	1(32)	2(34)	1(28)1(14)	1(17)	1(30)		1(28)	1(18)	1(34)	1(30)	1(20)	1(35)	1(25)	1(34)	1(24)1(34)	1(36)		1(26)				1(36)	1(20)	1(34)		1(34)	1(35)	1(32)	1(34)		1(23)
Scorpaena plumieri
Serranus tigrinus															2(8)								1(8)									1(14)
Sparisoma atomarium		2(14)2(10)	2(14)												4(10)4(16)	2(10)3(14)						2(8)						3(8)													1(12)		1(10)
Sparisoma aurofrenatum	4(20)	2(15)	3(14)	3(26)			2(25)		2(14)2(24)		2(24)		1(25)	2(25)	3(10)3(19)	2(14)3(23)	1(18) 2(22)	1(18)3(12)	2(13)1(26)	2(22)		2(20)3(22)2(14)	2(10)	2(16)4(20)	3(14)3(18)	4(12)(23)		3(16)3(20)		2(22)		2(30)	1(14)1(20	3(16)	2(16)	3(16)2(22)	3(13)	1(12)	1(23)				1(16)		2(18)	2(16)	1(8)	1(6)
Sparisoma chrysopterum		2(16)		2(26)		3(23)		4(16)							2(26)2(16)	3(24)1(14)			2(15)	2(15)5(20)	1(16)2(20)	1(18)3(22)2(12)	1(12)	3(18)	2(14)2(20)	4(15)2(20)	2(20)	2(16)3(22)	2(22)	2(18)2(22)	1(20)			2(20)	2(16)2(20)		3(14)2(24)			1(12)		1(23)		2(20)	3(18)	3(12)1(20)		1(6)
Sparisoma radians																			2(8)
Sparisoma rubripinne					2(24)		1(25)		1(38)	1(24)	1(22)		2(18)2(20)	1(19)		1(32)		2(22)	1(26)3(14)	2(23)	1(20)2(23)			1(23)	2(14)	3(20)1(14)	3(20)		1(16)(22)	3(20)	2(20)		1(10)1(18)	1(18)2(8)	2(16)1(8)	2(18)2(25)	5(18)				1(18)	1(18)	1(18)	3(18)		1(12)
Sparisoma viride	2(26)2(22)	3(20)1(30)2(10)	2(21)1(34)3(10)	3(24)1(36)	1(40)	5(22)3(34)	4(25)2(34)	2(23)2(32)	1(20)3(12)1(45)	2(20)1(33)	2(18)1(32)	1(18)1(28)	2(19)1(32)	3(19)2(30)	3(18)1(26)	3(22)2(32)	4(18)1(34)	3(16)1(24)2(12)	2(18)5(14)	3(18)1(30)	2(16)1(32)	4(18)2(32)	2(12)3(8)	3(22)1(34)	3(18)	4(20)3(8)	3(18)2(28)	4(18)1(34)3(8)	4(22)1(32)	4(18)2(30)	3(19)2(34)	5(22)1(33)	4(20)1(37)	2(19)	3(19)3(8)	2(37)2(12)	6(18)1(34)	2(14)	4(22)1(30)	2(10)1(6)	2(18)1(30)	3(18)1(35)	2(20)	3(18)1(32)	2(20)1(30)	3(8)1(45)
Sphoeroides spengleri
Sphoeroides testudineus
Sphyraena barracuda																1(50)															1(80)						1(45)1(70)
Sphyraena picudilla
Xyrichtys splendens
Stegastes diencaeus	3(8)		2(8)	4(8)	3(8)	3(8)	4(8)	6(8)	5(8)	3(8)	1(6)2(8)	3(8)	3(6)5(8)	3(8)	3(5)2(8)	2(4)4(8)	2(8)	3(8)	2(8)	2(4)3(8)	2(4)3(8)	2(4)2(8)	2(4)	3(8)	3(4)2(8)	3(5)2(8)	2(8)	2(6)	1(8)	2(8)	2(8)	1(8)	3(5)3(8)	3(6)4(8)	2(6)2(8)	2(5)3(8)	3(5)3(8)		2(8)				2(8)	2(8)	1(8)	2(4)5(8)
Stegastes fuscus	10(8)4(6)	8(8)2(6)	3(6)4(8)	3(6)12(8)	10(8)11(8)	5(6)10(8)	3(5)7(8)	4(6)8(8)	6(6)6(8)	3(6)5(8)	3(6)5(8)	6(6)10(10)	2(6)4(8)	4(6)11(8)	2(5)3(8)	2(4)6(8)	5(4)12(8)	3(4)3(8)	6(6)8(8)	5(5)5(8)	3(4)6(8)	3(5)6(8)	1(5)	3(4)8(8)	3(4)4(8)	2(5)4(8)	3(6)12(8)	3(4)3(8)	3(6)12(8)	2(6)8(8)	3(6)4(8)	2(6)8(8)	3(6)	5(5)6(8)	3(4)2(8)	4(4)3(8)	3(5)4(8)		2(8)	2(6)2(3)	2(8)	1(8)	2(8)	2(8)	2(8)	3(5)		2(8)
Stegastes leucostictus	1(8)	3(8)	2(8)	2(8)	2(8)	2(8)	4(8)	2(8)			1(8)	1(8)	1(8)	2(8)		1(8)	2(8)	3(8)	2(8)		1(8)	1(8)		1(8)	1(6)	1(8)	4(8)	3(8)	2(8)	1(8)	1(8)						2(8)		1(6)4(8)
Stegastes partitus	10(6)	8(6)4(4)	3(4)4(6)	12(6)	12(6)	4(4)10(6)	4(6)7(8)	3(4)12(6)	3(4)2(6)	6(4)6(6)	4(4)7(6)	4(4)8(6)	4(6)5(8)	3(5)7(6)	5(6)	9(6)	5(3)12(6)	5(3)6(6)	4(8)	5(3)7(6)	5(3)6(6)	3(8)	10(4)5(6)	5(3)10(6)	4(6)4(8)	5(3)6(6)	6(8)	6(3)6(6)	2(4)12(6)	2(4)10(6)	2(4)8(6)	1(8)	2(4)2(6)	5(4)3(6)	4(4)4(6)	3(3)3(6)	4(3)5(6)		6(6)	5(3)8(6)	2(3)12(6)	2(4)18(6)	10(6)	4(3)12(6)	4(6)	2(3)2(6)
Stegastes planifrons		2(8)	2(8)	1(8)	1(8)	4(8)	2(8)	2(8)		2(8)						3(8)				3(8)			1(4)		1(4)2(8)	2(8)	1(6)4(8)	3(8)	2(8)				3(8)	1(6)2(8)			1(8)
Stegastes variabilis	1(10)	5(8)		2(8)	2(8)	1(8)	1(8)	2(7)	3(8)	2(6)4(8)	2(8)	2(8)		2(8)	1(8)	1(8)	2(5)2(8)	2(8)	1(8)	4(4)6(8)	1(4)2(8)	1(4)2(8)	1(4)				1(8)	3(6)3(8)	1(8)		1(8)	2(8)	1(6)	2(8)	1(8)	3(8)	4(5)3(8)									4(6)		1(7)
Synodus saurus																					1(8)																1(6)
Thalassoma bifasciatum	20(10)10(8)	30(10)10(8)	6(8)6(10)5(6)	8(10)	8(10)	6(6)4(10)	5(6)10(10)	3(6)3(8)10(10)	4(10)	4(7)7(10)	3(6)10(10)	3(8)6(10)	5(8)5(10)	12(6)12(10)	4(6)5(10)	6(10)	4(6)8(10)	6(4)6(10)	6(10)	6(6)8(10)	3(4)6(10)	3(6)7(10)	4(5)6(8)	4(6)10(10)	16(6)10(10)	12(6)8(10)	3(6)12(10)	12(6)12(10)	4(8)8(10)	4(6)10(10)	3(6)8(10)	4(6)8(8)	6(6)4(10)	3(6)3(10)	4(6)6(10)	4(6)3(10)	8(6)10(10)		6(10)	2(6)2(10)	18(10)	10(10)	2(8)12(10)	5(8)30(10)	5(8)15(10)	5(6)5(10)
Urobatis jamaicensis
[truncated: 81 more columns]

## Sheet: Abundance .
Agosto-Septiembre 2008	Wall	Small patch	Small patch	Complex patch	Complex patch	Complex patch	Complex patch	Complex patch	Acropora patch	Complex patch	Complex patch	Complex patch	Complex patch	Complex patch	Small patch	Small patch	Complex patch	Small patch	Acropora patch	Complex patch	Complex patch	Small patch	coral beads	Complex patch	Small patch	Small patch	Complex patch	Small patch	Complex patch	Complex patch	Complex patch	Complex patch	Acropora patch	Acropora patch	Small patch	Small patch	Small patch	Arenal	Complex patch	coral beads	Hard bottom	Hard bottom	Hard bottom	Hard bottom	Hard bottom	Small patch	Seagrasses	Seagrasses	Sand
	1	2	3	4	5	6	7	8	9	10	11	12	13	14	15	16	17	18	19	20	21	22	23	24	25	26	27	28	29	30	31	32	33	34	35	36	37	38	39	40	41	42	43	44	45	46	47	48	49
Abudefduf saxatilis	1								45					29						3		8		7									25	25
Abudefduf taurus															3
Acanthurus coereleus	11	20	4	10	5	10	20	7	12	10	4	6	26	12	3	3	14	17	33	170	12	50	5	10	8	30	30	30	25	10	10	10	25	11	4	6	9		6	3	5	6	25	18	30	6	2		1
Acanthurus chirurgus	7	10	20	20	12	4	1	4	42	20	11	14	16	15			12	4	25	10	10	7	22	3	13	30	5	7	10	2	22	10	60	30	7	5	7		4	13	4	4	4	35	10	30	1	2
Aetobatus narinari
Anisotremus virginicus
Aulostomus maculatus				1																																	1
Balistes carolinensis															4
Balistes vetula		1							1						2	1	2			2		3	3		3	2							1		1		2			2		3	2	4	2	2
Bodianus rufus																2	2					1		1													2				1		1
Bothus lunatus																																		1		1	1
Calamus pennatula
Cantherhines macrocerus
Caranx hippos																																								1
Caranx latus
Caranx ruber	2	1	1					2	3	2	3	2	7	2				2	3			2		3	7	3		3	3		1		4	3						1						1
Clepticus parrae																	49		3		23			50		20	7	5	12	60	6	60
Cryptotomus roseus
Chaetodon aculeatus
Chaetodon capistratus	2	3	4	4	4	3	7	5	3	2	1	1		2	3	4	4	2	2	1	2	2			1	2	2	2	2	2	2	2	6	8	2	2	4		1			1	1	2	2	2
Chaetodon ocellatus								1							1	2												1		1
Chaetodon striatus		1	2	2	2	1		2	1	3	1						5	1	2		1	1			1	1								1	1				1			1		1	2	1
Chromis cyanea	40	10	16	14	23	5	13							4	53	30	62	31		8		5		70	20	15	10	21	7	5	21	62	10	10		12	7				17
Chromis multilineata																								47
Dasyatis americana																																					1
Diodon holocanthus		1													1
Diodon hystrix			1
Epinephelus adscensionis																																							1
Cephalopholis cruentata																																									1	1		5	6
Cephalopholis fulva		2	2				2		2				1	1								2	1						1													1		2	1
Epinephelus guttatus																															1	2							1
Epinephelus itajara
Epinephelus morio
Epinephelus striatus																													1		1
Gerres cinereus												3	2	2					11															1				2
Gymnothorax moringa
Ginglymostoma cirratum																																									1
Gramma loreto	9	3	4	5	20	30	20	24	5	14	2	8	4	7	6	5	7	6	7	15	8	14					10	6	5	7	5	4			6	7	6		5
Gramma melacara	2				2	2	2	1
Haemulon album																	1																								1	1	2
Haemulon aurolineatum						5		5	6	3	3	4		2								3			20				10						4		10
Haemulon carbonarium							1								2
Haemulon chrysargyreum								1	1	1			1				1									2			30	1			1				2
Haemulon flavolineatum	2	5	5		4	2	3	3	28	2	2	3	2	3	5	7	5	9	5		9	17	3	10	6	6	5	10		21	6	6	30	2	5	4	15		4		2		2		70	7
Haemulon macrostoma					2		1									3		7							3
Haemulon melanurum		4	3						3	3	22		15	6		4		4	2	2	13	8		6	4	4		6	3		2		3	5	4	6	6									2
Haemulon parra					2		1	2	1		1					2	4				1			3
Haemulon plumieri		5		2	5		4	7	32	4	3	2	3	10	3	8	6	5	7	5	2	6		2		7	2	3		3	2	3	11	3		6	6		9			2	1		10	4
Haemulon sciurus			2	2	2							2	2	4	2	3	5			3				1			1	3					1			2
Halichoeres bivittatus	4	1	4	2	6	5	10	9	3	10	7	2	3	5	8	5	3	8	3	9	4	13	5	3	2	5	2	6	2	3	2	2	6	5	3	7	8		2	6	3	2	2	3	2	8			1
Halichoeres garnoti	1	10	2	2	4	6	9	5	5	5	2	2	1	3	10	6	4	2	2	2	2	11	1	6	8	5		7	3	5	3	4	1	5	7	10	10		6	4	6	1	3	4	3	9	2	3
Halichoeres maculipinna		2	5	1	2	2	3	4	1	4	2		4	2	4	5	7	10	1	6	2	15	7	4	15	4	2	4	3	3	5	5	2	2	8	8	7		2	5	3	2	3	3	3	10	1	3
Halichoeres poeyi																																			2
Halichoeres radiatus		2	3	1	1	1	2	1		4	1				3	3						3			3												2			1	1		1	1	1	1	1	1
Xyrichtys splendens
Holacanthus ciliaris			2		1	3	4						1	1			1	1	1	1	1						2			1			2	2
Holacanthus tricolor	1				2	1						1					1					1				1	1					1	2	1		1	1		1					2	1
Holocentrus ascensionis								1	2					4	2	1				1			1	1					3	1							8		4	3	4	3	4	2	2	3
Holocentrus rufus	1	3	1				2	5		1	2				2					1				1	2	1	1(20)(22)	2				3	4	2		2			1
Hypoplectrus aberrans
Hypoplectrus indigo
Hypoplectrus nigricans																			1	1							1			1		1	1
Hypoplectrus puella												2													1						1
Hypoplectrus unicolor																		1	1								2		1			1
Inermia vittata																	130																									3		2		2
Kyphosus sectatrix																																	30
Lactophrys bicaudalis																									1								1
Lactophrys polygonius
Lactophrys triqueter
Lachnolaimus maximus							2		1																						1		1
Lutjanus analis										2	1		3	3		2	1				1						1	1	1				2				1		2
Lutjanus apodus		4	2		2			3	10	4		2	3	1					3	1				3		3	1				2	1	10	1
Lutjanus cyanopterus
Lutjanus griseus		5	4				1	1	4	2	3	1							5						6												2		2
Lutjanus jocu																															1
Lutjanus synagris		3	4						5	1				1	2	2			8			3
Malacanthus plumieri						5																															3					1		1
Melichthys niger	20														30	21																								4
Microspathodon chrysurus	1				1	1												5						1						2			10	15
Mycteroperca bonaci																																											1
Mycteroperca phenax
Mycteroperca tigris
Mycteroperca venenosa
Monacanthus tuckeri
Mulloidichthys martinicus						2	1	4			3	2	1	4	3	3				5	3						4						4	2812)											10	3
Myripristis Jacobus
Ocyurus chrysurus	20	1	4	2		5	2	3	5	5	3	2	2	4	16	30	32	20	6	12	3	4		8		4		5	10	13	7		4		4	2	20		6		9	5	2		10
Pomacanthus arcuatus				1																2																			2
Pomacanthus paru														1						1																						2		1
Priacanthus arenetus
Pseudopeneus maculatus							2				2	2	2				3			1							2	10	2
Rachycentron canadum																																									1
Scarus coelestinus																											2
Scarus coeruleus				1	1	2	1	3		1	1	1	1	1	1					1				1	2		1		1		2		1	1	1	1			2		1	2	1	1	1
Scarus guacamaia						1				1										1																1										1
Scarus iseri	1		3	2	2	3	2	2		1	1	2	1	1	1		2	2	2		1	3	1	2	2	4	1	2	3	2	3	1		2		1	2				1	1	1	2
Scarus taeniopterus	2	1	1	3	4	7	6	4	1	3	2	2	3	2	4	2	3	3	1	3	1	2	2	2	1	2	3	2	1	2	2	3	3	1	2		5		1	1		1	1	2	2	1
Scarus vetula	2	1	1	1	1	2	3	1	1	1		1	1	1	2	1	2	2	1	1		1	1	1	1	1	1	1	1	2	1		1				1	1	1		1	1	1	1		1
Scorpaena plumieri
Serranus tigrinus															2								1									1
Sparisoma atomarium		4	2												8	5						2						3													1		1
Sparisoma aurofrenatum	4	2	3	3			2		4		2		1	2	6	5	3	4	3	2		7	2	6	6	4(12)(23)		6		2		2	2	3	2	5	3	1	1				1		2	2	1	1
Sparisoma chrysopterum		2		2		3		4							4	4			2	7	3	6	1	3	4	6	2	5	2	4	1			2	4		5			1		1		2	3	4		1
Sparisoma radians																			2
Sparisoma rubripinne					2		1		1	1	1		4	1		1		2	4	2	3			1	2	4	3		1(16)(22)	3	2		2	3	3	4	5				1	1	1	3		1
Sparisoma viride	4	6	6	4	1	8	6	4	5	3	3	2	3	5	4	5	5	6	7	4	3	6	5	4	3	7	5	8	5	6	5	6	5	2	6	4	7	2	5	3	3	4	2	4	3	4
Sphoeroides spengleri
Sphoeroides testudineus
Sphyraena barracuda																1															1						2
Sphyraena picudilla
Xyrichtys splendens
Stegastes diencaeus	3	0	2	4	3	3	4	6	5	3	12	3	8	3	5	6	2	3	2	5	5	4	2	3	5	5	2	2	1	2	2	1	6	7	4	5	6		2				2	2	1	7
Stegastes fuscus	14	10	7	15	21	15	10	12	12	8	8	16	6	15	5	8	17	6	14	10	9	9	1	11	7	6	15	6	15	10	7	10	3	11	5	7	7		2	4	2	1	2	2	2	3		2
Stegastes leucostictus	1	3	2	2	2	2	4	2			1	1	1	2		1	2	3	2		1	1		1	1	1	4	3	2	1	1						2		5
Stegastes partitus	10	12	7	12	12	14	11	15	5	12	11	12	9	10	5	9	17	11	4	12	11	3	15	15	8	11	6	12	14	12	10	1	4	8	8	6	9		6	13	14	20	10	16	4	4
Stegastes planifrons		2	2	1	1	4	2	2		2						3				3			1		3	2	5	3	2				3	3			1
Stegastes variabilis	1	5		2	2	1	1	2	3	6	2	2		2	1	1	4	2	1	10	3	3	1				1	6	1		1	2	1	2	1	3	7									4		1
Synodus saurus																					1																1
Thalassoma bifasciatum	30	40	17	8	8	10	15	16	4	11	13	9	10	24	9	6	12	12	6	14	9	10	10	14	16	20	15	24	12	14	11	12	10	6	10	7	18		6	4	18	10	14	35	20	10
Urobatis jamaicensis					162
	196	185	148	129	324	168	181	173	262	155	136	112	147	197	225	210	430	191	182	337	147	236	91	304	185	214	156	215	194	201	150	216	298	184	104	125	222	6	91	69	101	81	91	156	203	133	8	14	2
[truncated: 82 more columns]
